# Supplementary material for: Heating-induced negative temperature coefficient effect in conductive graphene/polymer ternary nanocomposites with a segregated and double-percolated structure
Source: Royal Society of Chemistry journal article supplement (doi:10.1039/c7tc02472j), 2017-01-01
Supplement: c7tc02472j1.pdf [file c7tc02472j1.pdf]

Electronic Supplementary Information (ESI) for

**Heating induced negative temperature coefficient effect in  
conductive graphene/polymer ternary nanocomposites with a  
segregated and double-percolated structure**

Shuaiguo Zhao,<sup>1</sup> Dandan Lou,<sup>1</sup> Pengfei Zhan,<sup>1</sup> Guojie Li,<sup>1</sup> Kun Dai,<sup>1,2,\*</sup> Jiang Guo,<sup>3</sup>  
Guoqiang Zheng,<sup>1</sup> Chuntai Liu,<sup>1</sup> Changyu Shen,<sup>1</sup> and Zhanhu Guo<sup>3,\*</sup>

<sup>1</sup> School of Materials Science and Engineering,  
The Key Laboratory of Material Processing and Mold of Ministry of Education,  
Zhengzhou University, Zhengzhou, Henan 450001, P.R. China

<sup>2</sup> State Key Laboratory of Polymer Materials Engineering,  
Sichuan University, Chengdu, Sichuan 610065, PR China

<sup>3</sup> Integrated Composites Laboratory (ICL),  
Department of Chemical & Biomolecular Engineering,  
University of Tennessee, Knoxville, TN 37996 USA

*\*: Correspondence authors*

Tel.: +86-371-63887969;

E-mail addresses: [kundai@zzu.edu.cn](mailto:kundai@zzu.edu.cn) (K. D.),

[zguo10@utk.edu](mailto:zguo10@utk.edu) (Z. G.)

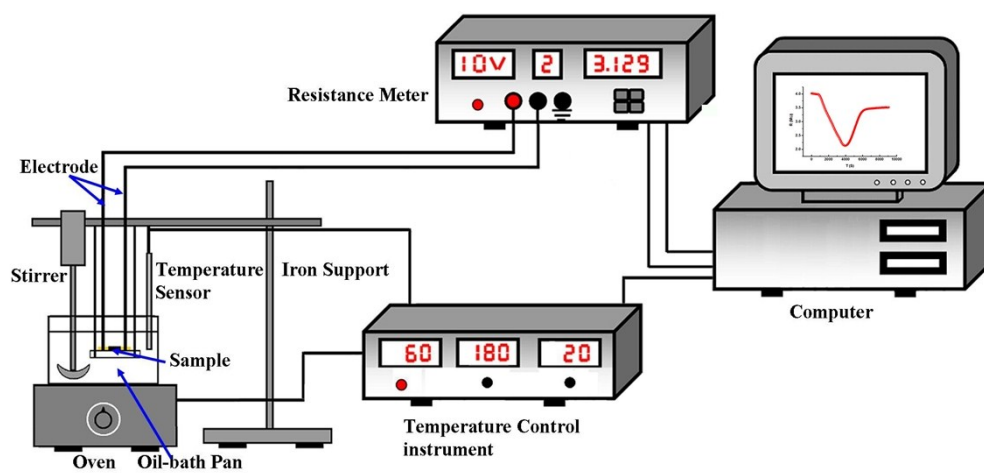

**Fig. S1.** The schematic figure of the equipment for temperature-resistivity test.
